# Supplementary material for: Repeated Measurements of Cardiac Troponin T and N-Terminal Pro-B-Type Natriuretic Peptide to Assess Long-Term Mortality Risk in Subjects with Osteoarthritis
Source: MDPI journal article supplement (doi:10.3390/biom11020230), 2021-02-05
Supplement: s1 [file s1]

## Supplementary Materials

**Supplement Table S1.** Baseline Characteristics of Included and Excluded Subjects

| Characteristic                     | Category | Included<br>( <i>n</i> = 347) | Excluded<br>( <i>n</i> = 462) | Total<br>( <i>n</i> = 809) | <i>p</i> -Value |
|------------------------------------|----------|-------------------------------|-------------------------------|----------------------------|-----------------|
| Age, years                         |          | 64.0 (12.0)                   | 66.0 (11.0)                   | 65.0 (12.0)                | 0.006           |
| Sex                                | Male     | 133 (38.3%)                   | 172 (37.2%)                   | 305 (37.7%)                | 0.750           |
|                                    | Female   | 214 (61.7%)                   | 290 (62.8%)                   | 504 (62.3%)                |                 |
| Localization of OA                 | Hip      | 198 (57.1%)                   | 222 (48.1%)                   | 420 (51.9%)                | 0.011           |
|                                    | Knee     | 149 (42.9%)                   | 240 (51.9%)                   | 389 (48.1%)                |                 |
| Body Mass Index, kg/m <sup>2</sup> |          | 27.7 (5.6)                    | 28.2 (5.2)                    | 27.9 (5.4)                 | 0.365           |
| Smoking Status                     | Never    | 195 (56.2%)                   | 274 (59.3%)                   | 469 (58.0%)                | 0.556           |
|                                    | Former   | 109 (31.4%)                   | 129 (27.9%)                   | 238 (29.4%)                |                 |
|                                    | Current  | 43 (12.4%)                    | 59 (12.8%)                    | 102 (12.6%)                |                 |
| Diabetes mellitus                  |          | 31 (8.9%)                     | 39 (8.4%)                     | 70 (8.7%)                  | 0.668           |
| Hypertension                       |          | 165 (47.6%)                   | 250 (54.1%)                   | 415 (51.3%)                | 0.065           |
| Myocardial Infarction              |          | 11 (3.2%)                     | 23 (5.0%)                     | 34 (4.2%)                  | 0.305           |
| Heart Failure                      |          | 49 (14.1%)                    | 104 (22.5%)                   | 153 (18.9%)                | 0.007           |
| Cholesterol, mmol/L                |          | 5.7 (1.2)                     | 5.7 (1.3)                     | 5.7 (1.3)                  | 0.855           |
| Triglyceride, mmol/L               |          | 1.5 (1.2)                     | 1.5 (1.1)                     | 1.5 (1.1)                  | 0.050           |
| Uric Acid, mmol/L                  |          | 313.0 (107.5)                 | 315.4 (113.0)                 | 315.4 (111.0)              | 0.375           |
| Cystatin C, mg/L                   |          | 0.9 (0.2)                     | 0.9 (0.3)                     | 0.9 (0.2)                  | 0.142           |
| eGFR, mL/min/1.73 m <sup>2</sup>   |          | 80.3 (26.9)                   | 76.8 (27.3)                   | 78.2 (27.4)                | 0.034           |
| hs-CRP, mg/L                       |          | 2.3 (3.7)                     | 2.6 (3.9)                     | 2.5 (3.8)                  | 0.427           |

Values are reported as n (%) or median (interquartile range). Differences between included and excluded subjects are analyzed using the Chi-square test for categorical data, One-Way ANOVA or Kruskal-Wallis for continuous data (depending on the distribution).

Supplement Table S2. Correlates of ln-transformed NT-proBNP Concentrations

| Variable                           | Baseline ln(NT-proBNP) |                  |                |                  | Follow-up ln(NT-proBNP) |                  |                |                  |
|------------------------------------|------------------------|------------------|----------------|------------------|-------------------------|------------------|----------------|------------------|
|                                    | Bivariate              |                  | Multivariate   |                  | Bivariate               |                  | Multivariate   |                  |
|                                    | $\beta$ -Coef.         | <i>p</i> -Value  | $\beta$ -Coef. | <i>p</i> -Value  | $\beta$ -Coef.          | <i>p</i> -Value  | $\beta$ -Coef. | <i>p</i> -Value  |
| Age, years                         | <b>0.05</b>            | <b>&lt;0.001</b> | <b>0.04</b>    | <b>&lt;0.001</b> | <b>0.06</b>             | <b>&lt;0.001</b> | <b>0.04</b>    | <b>&lt;0.001</b> |
| Female Sex                         | <b>0.45</b>            | <b>&lt;0.001</b> | <b>0.30</b>    | <b>0.005</b>     | <b>0.53</b>             | <b>&lt;0.001</b> | <b>0.30</b>    | <b>0.041</b>     |
| Knee OA                            | 0.09                   | 0.426            |                |                  | <b>0.32</b>             | <b>0.029</b>     | -0.07          | 0.606            |
| Body Mass Index, kg/m <sup>2</sup> | 0.01                   | 0.423            |                |                  | 0.02                    | 0.156            |                |                  |
| Current Smoking                    | <b>-0.32</b>           | <b>0.048</b>     | 0.10           | 0.522            | -0.31                   | 0.158            |                |                  |
| Diabetes mellitus                  | 0.17                   | 0.363            |                |                  | 0.49                    | 0.055            |                |                  |
| Hypertension                       | <b>0.51</b>            | <b>&lt;0.001</b> | <b>0.24</b>    | <b>0.022</b>     | <b>0.77</b>             | <b>&lt;0.001</b> | <b>0.49</b>    | <b>&lt;0.001</b> |
| Myocardial Infarction              | 0.47                   | 0.126            |                |                  | 0.81                    | 0.050            |                |                  |
| Heart Failure                      | <b>0.63</b>            | <b>&lt;0.001</b> | 0.19           | 0.203            | <b>0.58</b>             | <b>0.005</b>     | 0.00           | 0.995            |
| Cholesterol, mmol/L                | 0.03                   | 0.512            |                |                  | -0.01                   | 0.855            |                |                  |
| Triglyceride, mmol/L               | 0.00                   | 0.918            |                |                  | 0.01                    | 0.868            |                |                  |
| Uric Acid, mmol/L                  | 0.00                   | 0.244            |                |                  | 0.00                    | 0.541            |                |                  |
| Cystatin C, mg/L                   | <b>1.37</b>            | <b>&lt;0.001</b> | <b>0.79</b>    | <b>0.003</b>     | <b>1.53</b>             | <b>&lt;0.001</b> | <b>0.75</b>    | <b>0.035</b>     |
| eGFR, mL/min/1.73m <sup>2</sup>    | <b>-0.01</b>           | <b>&lt;0.001</b> | 0.00           | 0.355            | <b>-0.02</b>            | <b>&lt;0.001</b> | 0.00           | 0.756            |
| ln(hs-CRP, mg/L)                   | 0.09                   | 0.068            |                |                  | 0.12                    | 0.078            |                |                  |

Multivariate linear regression analysis was used to identify the baseline variables (with bivariate  $p < 0.05$ ) independently associated with NT-proBNP concentrations.

**Supplement Table S3.** Categories of Changes in hs-cTnT Concentrations between Baseline and one-year Follow-up and Mortality (*n* = 347, 209 Deaths)

| hs-cTnT, ng/L |             | Subjects<br>( <i>n</i> = 347) | Deaths*     | Rate per 100 p-yr<br>(95% CI) |
|---------------|-------------|-------------------------------|-------------|-------------------------------|
| Baseline      | Follow-up   |                               |             |                               |
| < 5.0         | < 5.0       | 223 (64.3%)                   | 109 (48.9%) | 2.7 (2.2– 3.3)                |
| < 5.0         | 5.0 –< 14.0 | 14 (4.0%)                     | 11 (78.6%)  | 5.0 (2.8–9.1)                 |
| < 5.0         | ≥ 14.0      | 2 (0.6%)                      | 2 (100.0%)  | 5.5 (1.4–22.0)                |
| 5.0 –< 14.0   | < 5.0       | 53 (15.3%)                    | 39 (73.6%)  | 4.5 (3.3–6.2)                 |
| 5.0 –< 14.0   | 5.0 –< 14.0 | 35 (10.1%)                    | 29 (82.9%)  | 5.5 (3.8–7.9)                 |
| 5.0 –< 14.0   | ≥ 14.0      | 7 (2.0%)                      | 6 (85.7%)   | 5.8 (2.6–12.9)                |
| ≥ 14.0        | < 5.0       | 4 (1.1%)                      | 4 (100.0%)  | 6.9 (2.6–18.4)                |
| ≥ 14.0        | 5.0 –< 14.0 | 1 (0.3%)                      | 1 (100.0%)  | 5.6 (0.8–39.6)                |
| ≥ 14.0        | ≥ 14.0      | 8 (2.3%)                      | 8 (100.0%)  | 12.4 (6.2–24.8)               |

\* The percentages are the cumulative incidences in the respective category. p-yr indicates person-years at risk of death.

**Supplement Table S4.** Cox Proportional Hazard Models for Mortality with Truncation of Follow-up at 5, 10, and 20 Years

| Parameter                               | Model 1 | Model 2          | Model 3          | Model 4          | Model 5          |
|-----------------------------------------|---------|------------------|------------------|------------------|------------------|
| <b>Follow-up 5 years</b>                |         |                  |                  |                  |                  |
| Hazard ratio for mortality, per SD (ln) |         |                  |                  |                  |                  |
| NT-proBNP Baseline                      |         | 1.39 (0.83–2.32) |                  | 1.28 (0.57–2.87) |                  |
| NT-proBNP Follow-up                     |         |                  | 1.35 (0.78–2.36) | 1.11 (0.48–2.58) | 1.52 (0.74–3.11) |
| Relative Change                         |         |                  |                  |                  | 0.82 (0.36–1.87) |
| <b>Follow-up 10 years</b>               |         |                  |                  |                  |                  |
| Hazard ratio for mortality, per SD (ln) |         |                  |                  |                  |                  |
| NT-proBNP Baseline                      |         | 1.32 (1.02–1.72) |                  | 1.22 (0.80–1.87) |                  |
| NT-proBNP Follow-up                     |         |                  | 1.30 (0.99–1.73) | 1.11 (0.72–1.72) | 1.43 (0.99–2.05) |
| Relative Change                         |         |                  |                  |                  | 0.85 (0.56–1.30) |
| <b>Follow-up 20 years</b>               |         |                  |                  |                  |                  |
| Hazard ratio for mortality, per SD (ln) |         |                  |                  |                  |                  |
| NT-proBNP Baseline                      |         | 1.36 (1.15–1.61) |                  | 1.18 (0.92–1.51) |                  |
| NT-proBNP Follow-up                     |         |                  | 1.38 (1.16–1.64) | 1.22 (0.95–1.58) | 1.53 (1.22–1.92) |
| Relative Change                         |         |                  |                  |                  | 0.84 (0.66–1.07) |

Values are estimates with 95% confidence intervals.

Relative change is calculated as the percentage difference in ln(NT-proBNP) between baseline and one-year follow-up.

Note that subjects with hs-cTnT and NT-proBNP concentrations <5.0 ng/L had values imputed as 2.5 ng/L.

Model 1—Age, sex, BMI, current smoking, history of heart failure and diabetes mellitus, and baseline ln(hs-cTnT).

Model 2—Model 1 + Baseline ln(NT-proBNP).

Model 3—Model 1 + Follow-up ln(NT-proBNP).

Model 4—Model 1 + Baseline ln(NT-proBNP) + Follow-up ln(NT-proBNP).

Model 5—Model 1 + Follow-up ln(NT-proBNP) + Relative Change of ln(NT-proBNP).
